## 1 **IgA Potentiates NETosis in Response to Viral Infection**

2

3 Hannah D. Stacey<sup>1,2,3</sup>, Diana Golubeva<sup>1,2,3</sup>, Alyssa Posca<sup>1,2,3</sup>, Jann C. Ang<sup>1,2,3</sup>, Kyle E.  
4 Novakowski<sup>1,2,4</sup>, Muhammad Atif Zahoor<sup>2,4,a</sup>, Charu Kaushic<sup>2,4</sup>, Ewa Cairns<sup>5,6</sup>, Dawn M. E.  
5 Bowdish<sup>1,2,4</sup>, Caitlin E. Mullarkey<sup>1</sup> and Matthew S. Miller<sup>1,2,3\*</sup>

6

7 <sup>1</sup>Michael G. DeGroote Institute for Infectious Diseases Research, McMaster University,  
8 Hamilton, ON, Canada

9 <sup>2</sup>McMaster Immunology Research Centre, McMaster University, Hamilton, ON, Canada

10 <sup>3</sup>Department of Biochemistry and Biomedical Sciences, McMaster University, Hamilton, ON,  
11 Canada

12 <sup>4</sup>Department of Medicine, McMaster University, Hamilton, ON, Canada

13 <sup>5</sup>Department of Microbiology and Immunology, Schulich School of Medicine and Dentistry,  
14 Western University, London, ON, Canada

15 <sup>6</sup>Department of Medicine, Division of Rheumatology, Schulich School of Medicine and  
16 Dentistry, Western University, London, ON, Canada

17 <sup>a</sup>Current address: Toronto Center for Liver Disease, Toronto General Hospital Research,  
18 Institute, MaRS-Princess Margaret Cancer Research Tower 10-401, University Health Network,  
19 101-College St. □ Toronto, ON, Canada

20

21 \*Corresponding author: McMaster University, 1280 Main St. W, Hamilton, ON, Canada, L8S  
22 4K1

23 Email: mmiller@mcmaster.ca

24

25

26 **KEYWORDS:** NETosis; NETs; neutrophils; IgA; Fc alpha receptor; influenza virus; broadly-  
27 neutralizing antibodies; SARS-CoV-2; autoimmunity

28

29

30

31

32

33

34

35

36

37

38

39

40

41

42 **ABSTRACT**

43  
44 IgA is the second most abundant antibody present in circulation and is enriched at mucosal  
45 surfaces. As such, IgA plays a key role in protection against a variety of mucosal pathogens,  
46 including viruses. In addition to neutralizing viruses directly, IgA can also stimulate Fc-  
47 dependent effector functions via engagement of Fc alpha receptors (Fc $\alpha$ RI) expressed on the  
48 surface of certain immune effector cells. Neutrophils are the most abundant leukocyte, express  
49 Fc $\alpha$ RI, and are often the first to respond to sites of injury and infection. Here, we describe a  
50 novel function for IgA:virus immune complexes (ICs) during viral infections. We show that  
51 IgA:virus ICs potentiate NETosis – the programmed cell death pathway through which  
52 neutrophils release neutrophil extracellular traps (NETs). Mechanistically, IgA:virus ICs  
53 potentiated a suicidal NETosis pathway via engagement of Fc $\alpha$ RI on neutrophils through a toll-  
54 like receptor (TLR)-independent, NADPH oxidase complex-dependent pathway. NETs also were  
55 capable of trapping and inactivating viruses, consistent with an antiviral function.

56

57

58

59

60

61

62

63

64

65

66

67

68

69

70

71

72

73

74

75 **INTRODUCTION**

76

77 IgA antibodies have pleiotropic roles in regulating the response to microbes. In the context of  
78 infection, IgA antibodies enriched at mucosal surfaces as secretory IgA (sIgA) are capable of  
79 neutralizing viruses in an “anti-inflammatory” manner since these antibodies block infection but  
80 do not activate immune cells via Fc receptor engagement. However, monomeric IgA (mIgA)  
81 antibodies, which are abundant in serum, are capable of engaging Fc receptors on the surface of  
82 immune cells to elicit effector functions (Bakema and van Egmond, 2011).

83 Neutrophils are not only the most abundant leukocytes, but are often the first to respond to sites  
84 of injury and infection (Kolaczowska and Kubes, 2013). Human neutrophils express the Fc  
85 alpha receptor (Fc $\alpha$ RI/CD89) and are capable of exerting a variety of effector functions  
86 including phagocytosis, respiratory burst, antibody dependent cellular phagocytosis (ADCP), and  
87 NETosis (Monteiro and Van De Winkel, 2003; Papayannopoulos, 2018). Data regarding the  
88 protective versus pathogenic role of neutrophils during viral infection is nuanced and suggests  
89 context is critical in determining outcome. For example, while neutrophils are required for  
90 protection during the early stages of influenza A virus (IAV) infection, neutrophils also release  
91 reactive oxygen species (ROS), proteolytic enzymes, and a variety of inflammatory mediators  
92 that can damage lung tissues. As a result, excessive neutrophil infiltration has been associated  
93 with severe lung injury (Camp and Jonsson, 2017).

94 The generation of NETs was first described by the Zychlinsky laboratory in 2004 as an  
95 antibacterial effector mechanism (Brinkmann et al., 2004). NETs produced via a specialized  
96 form of programmed cell death called “NETosis” and are composed primarily of decondensed  
97 chromatin studded with antimicrobial proteins. Extensive work by many laboratories has since  
98 demonstrated that NETs can have not only protective, but also pathogenic consequences in

99 infections and many other diseases (Papayannopoulos, 2018). The understanding of how NETs  
100 influence viral infections continues to evolve. In the context of Chikungunya virus and poxvirus,  
101 NETs were capable of trapping virus and controlling infection in a mouse models of disease  
102 (Hiroki et al., 2020; Jenne et al., 2013). Likewise, NETs have been shown to trap and inactivate  
103 HIV (Saitoh et al., 2012). However, NETs have also been described to exacerbate disease in the  
104 context of Dengue virus, rhinovirus, respiratory syncytial virus, influenza virus, and most  
105 recently, SARS-CoV-2 infection (Sung et al., 2019; Cortjens et al., 2016; Toussaint et al., 2017;  
106 Narasaraju et al., 2011; Radermecker et al., 2020; Middleton et al., 2020; Barnes et al., 2020).  
107 Thus, the overall impact of NETs during a viral infection must be interpreted carefully in  
108 conjunction with other infection parameters.

109 Recently, Fc-dependent effector functions have been shown to play a central role in the  
110 protection conferred by broadly-neutralizing antibodies (bnAbs) that bind to the hemagglutinin  
111 (HA) stalk domain of IAV (DiLillo et al., 2016, 2014; He et al., 2017). However, these studies  
112 have only been performed in the context of monoclonal IgG antibodies. Elicitation of bnAbs is  
113 now the goal of several “universal” influenza virus vaccine candidates, including “chimeric” HA  
114 vaccines that were recently tested in a Phase I clinical trial (Bernstein et al., 2019). Antibody-  
115 dependent cellular cytotoxicity (ADCC) may also augment protection mediated by human  
116 immunodeficiency virus (HIV)-neutralizing antibodies (Forthal and Finzi, 2018). However,  
117 despite the fact that both IAV and HIV are mucosal pathogens – almost nothing is known about  
118 the contribution of IgA-mediated Fc-dependent effector functions during infection. This is due,  
119 in large part, to the fact that mice do not express an Fc $\alpha$ R homolog which presents significant  
120 challenges for assessing the contributions of IgA to outcomes *in vivo* (Bakema and van Egmond,  
121 2011).

122 Here, we show that IgA:virus ICs potentiated NETosis through Fc $\alpha$ RI signaling on neutrophils.  
123 This potentiation was not virus-specific, and could be observed for IAV, HIV, SARS-CoV-2 and  
124 extended to IgA ICs generated with antibodies/autoantigens from RA patients. In contrast to  
125 NETosis stimulated by virus directly, IgA:virus ICs stimulated suicidal NETosis that was  
126 independent of TLR signaling. Finally, viruses were trapped and inactivated in NETs, suggesting  
127 a protective role *in vivo* when properly regulated.

128

## 129 **RESULTS**

### 130 **IgA:IAV immune complexes stimulate NETosis**

131 Historically, antibodies have been thought to mediate protection against influenza viruses  
132 primarily by binding to the HA head domain and blocking interaction between the receptor  
133 binding site on HA and sialic acids on the surface of host cells. However, more recently it has  
134 become clear that bnAbs that bind to the HA stalk domain mediate protection *in vivo* primarily  
135 by elicitation of Fc-dependent effector functions (DiLillo et al., 2014, 2016; He et al., 2017).  
136 Antigen-specific IgA antibodies have been shown to neutralize IAV, but relatively little is known  
137 about IgA-mediated Fc-dependent effector functions during IAV infection (He et al., 2015).  
138 Neutrophils are the most abundant leukocyte and are among the first to respond during IAV  
139 infection (Tate et al., 2009). Neutrophils also express Fc $\alpha$ RI, and we have previously shown that  
140 IgA:IAV ICs stimulate ROS production in neutrophils; however, unlike IgG:influenza virus ICs,  
141 this could not be fully inhibited by cytochalasin D – indicating that IgA-mediated ROS  
142 production was not due to antibody-dependent cellular phagocytosis (ADCP) (Mullarkey et al.,  
143 2016). To determine whether IgA was capable of potentiating NETosis upon binding IAV,  
144 neutrophils were exposed to antibody:IAV ICs composed of polyclonal (monomeric) IgA or IgG

145 from the peripheral blood of donors previously vaccinated with seasonal influenza vaccines  
146 containing the A/California/04/2009 (Cal/09) H1N1 component. Phorbol 12-myristate13-acetate  
147 (PMA), a potent inducer of NETosis, was used as a positive control (Fuchs et al., 2007).  
148 IgA:IAV ICs stimulated significantly higher levels of NETosis than antibodies or virus alone,  
149 whereas IgG:IAV ICs did not induce NETosis above background levels (Fig. 1A, B).

150 In the context of IgG, bnAbs that bind to the stalk domain have been shown to potently elicit Fc-  
151 dependent effector functions, whereas antibodies that bind to the HA head domain and exhibit  
152 hemagglutination inhibiting (HAI) activity do not. This is because HA stalk-binding bnAbs  
153 allow for a two points of contact between target and effector cells (He et al., 2016; Leon et al.,  
154 2016). To determine whether broadly-neutralizing IgA:IAV ICs are primarily responsible for the  
155 induction of NETosis observed in the context of IAV-specific polyclonal IgA, we used a panel of  
156 previously-described monoclonal antibodies that bind to neutralizing epitopes on either the HA  
157 head or stalk domains (Tan et al., 2012, 2014; Heaton et al., 2013). The antibody KB2 binds to  
158 the HA stalk domain of H1 viruses, while 29E3 is specific to the HA head domain of Cal/09 (Hai  
159 et al., 2012). When human neutrophils were incubated with ICs containing a IAV:IgA stalk-  
160 binding antibody (KB2), significant induction of NETosis was observed following 3-hour  
161 stimulation (Fig. 1C). In contrast, NETosis was not induced by IgG:IAV ICs, or by antibodies or  
162 virus alone (Fig. 1C). All ICs generated with a HA head-binding antibody (29E3) failed to  
163 induce NETosis (Fig. 1D).

164 In blood, IgA co-circulates with other antibodies, including IgG, which signals through distinct  
165 FcRs (FcγRs) and can also induce NETosis (Lood et al., 2017). Mixed ICs composed of  
166 IgG/IgA:HIV have also been shown to act cooperatively to stimulate ADCC by monocytes  
167 (Duchemin et al., 2020). We therefore tested whether mixed ICs composed of IAV bound by IgA

168 and IgG together would influence the magnitude of NETosis induction relative to IgA alone.  
169 When ICs were generated with a 1:1 ratio of IgG:IgA, the magnitude of NETosis induction was  
170 similar to IgA alone (Fig. 1E). In serum, IgG is significantly more abundant than IgA (approx.  
171 4:1 to 10:1). Thus, to recapitulate the physiological stoichiometry of IgG:IgA, we purified each  
172 immunoglobulin from serum of matched donors, and then recombined them at their natural  
173 physiological ratio. Here again, the magnitude of NETosis observed in mixed IgG:IgA immune  
174 complexes was similar to IgA alone, indicating that IgG does not potentiate IgA-mediated  
175 NETosis, nor does it interfere with the ability of IgA to stimulate NETosis (Fig. 1F). Taken  
176 together, these results demonstrate that IgA:virus ICs stimulate neutrophils to undergo NETosis.

177

#### 178 **IgA-mediated NETosis is not an IAV- specific phenomenon**

179 NETs have been observed in the context of many other infections, including those caused by  
180 SARS-CoV-2 and HIV. In these studies, viruses were presumed to stimulate NETosis directly  
181 (Veras et al., 2020; Radermecker et al., 2020; Zuo et al., 2020; Barnes et al., 2020). We thus  
182 performed an experiment to test the amount of virus needed to stimulate NETosis independent of  
183 Fc $\alpha$ R signaling. Neutrophils were stimulated with increasing concentrations of purified  
184 lentiviruses pseudotyped with the SARS-CoV-2 spike protein. A significant elevation in  
185 NETosis was observed when neutrophils were exposed to 0.05 and 0.2 mg/mL of purified virus  
186 (Fig. 2A). We then purified IgA from convalescence serum of a SARS-CoV-2 infected  
187 individual, and a SARS-CoV-2 naïve individual, incubated them with sub-stimulatory  
188 concentrations (0.0125 mg/mL) of spike pseudotyped lentiviruses to allow for IC formation, and  
189 then incubated these mixtures with primary human neutrophils from healthy donors. As we  
190 observed in the context of IAV, IgA:virus IC generated with IgA purified from SARS-CoV-2

191 convalescence serum was capable of stimulating NETosis, whereas pseudovirus:IgA mixtures  
192 from naïve serum was not (Fig 2B). These results confirm that IgA:virus ICs more potently  
193 stimulate NETosis when compared to virus alone, and that ICs are required for this potentiation,  
194 since IgA from seronegative individuals did not significantly induce NETosis when mixed with  
195 pseudotyped lentivirus.

196 We also incubated neutrophils with antibody:HIV ICs which contained HIV-specific IgA  
197 isolated from the serum of HIV+ individuals. Following stimulation, a significant increase in  
198 NETosis was observed in cells treated with anti-HIV IgA containing ICs (Fig. 2C). Background  
199 levels of NETosis were observed when cells were treated with either IgA or virus alone. These  
200 findings demonstrate that IgA induced NETosis likely happens in the context of many viral  
201 infections.

202 NETs have also been implicated in the pathogenesis of a variety of autoimmune conditions,  
203 including rheumatoid arthritis (RA) where they serve as a source of autoantigen (Aleyd et al.,  
204 2016; Wright et al., 2014). Patients with autoimmune diseases commonly have autoantibodies  
205 against NET elements such as histones, DNA, and neutrophil elastase. Here, neutrophils were  
206 stimulated with Ab:autoantigen ICs composed of IgA or IgG purified from the serum of RA  
207 patients or healthy donors, and recombinant citrullinated human fibrinogen, a common  
208 autoantigen in RA (Hill et al., 2006). Induction of NETosis was observed in neutrophils  
209 stimulated with IgA:citrullinated fibrinogen immune complexes from RA patients, but not in  
210 those stimulated with IgG-containing ICs or ICs generated with antibodies from healthy donors  
211 (Fig. 2D). Together, these data demonstrate that potentiation of NETosis is a common property  
212 of virus:IgA immune complexes, as well as ICs composed of IgA:autoantigens.

213



214 **Induction of NETosis by IgA immune complexes is dependent on Fc $\alpha$ RI and independent**  
215 **of TLR signaling**

216 We next assessed whether salivary IgA (sIgA) was capable of inducing NETosis. Whereas  
217 monomeric IgA (mIgA) is found predominantly in circulation, secretory IgA is enriched at  
218 mucosal surfaces and is generally regarded as an anti-inflammatory antibody. sIgA from saliva  
219 and serum-derived mIgA was purified from matched vaccinated donors used to generate ICs  
220 with IAV. ICs containing sIgA did not potentiate NETosis, whereas serum-derived mIgA from  
221 the same donors was capable of eliciting NETosis, as we had observed previously (Fig. 3A).  
222 These results are consistent with previous studies that have demonstrated that the secretory  
223 component sterically blocks binding of secretory IgA to Fc $\alpha$ RI (CD89) (Herr et al., 2003).

224 Given the observation that sIgA:IAV ICs failed to induce NETosis, we investigated whether  
225 mIgA-mediated NETosis was dependent on engagement of Fc $\alpha$ RI (CD89). To this end,  
226 neutrophils were incubated with a blocking monoclonal anti-CD89 antibody prior to stimulation  
227 with IgG:virus or IgA:virus ICs. Blocking with anti-CD89 abrogated induction of NETosis  
228 following stimulation with IgA ICs (Fig. 3B), confirming that engagement of Fc $\alpha$ RI is required  
229 for IgA:virus IC-mediated induction of NETosis.

230 TLR8 activation has been shown to shift neutrophils from phagocytosis to NETosis in the  
231 context of IgG IC-mediated NETosis via Fc $\gamma$ RIIA signaling (Lood et al., 2017). We thus set out  
232 to determine whether TLR signaling was required for IgA-mediated NETosis induction. TLR8  
233 senses single-stranded RNA and is an important pattern-recognition receptor during RNA virus  
234 infection (Heil et al., 2004). Since IAV particles contain RNA, we elected to use a system free  
235 from TLR7/8 ligands. To this end, polystyrene beads (roughly equal in number to IAV particles  
236 used in previous experiments) were coated with protein L and polyclonal IgA. Protein L binds to

237 the  $\kappa$  light chain of antibodies, leaving the antibody Fc region capable of interacting with FcRs  
238 on the cell surface. Following stimulation, IgA:bead ICs induced significant NETosis relative to  
239 beads alone (Fig. 3C). This suggests that unlike IgG IC-mediated NETosis, IgA IC-mediated  
240 NETosis is likely independent of TLR signaling.

241 Neutrophils are professional phagocytes, and ADCP is one of the many Fc-mediated effector  
242 functions that contribute to their defense against pathogens (Mullarkey et al., 2016). To directly  
243 measure whether IgA ICs induced phagocytosis, fluorescent, protein L-coated polystyrene beads  
244 were complexed with IgA or IgG prior to incubation with neutrophils. After incubation with  
245 beads, cells were washed extensively to remove any beads that had not been phagocytosed.  
246 Significantly greater bead uptake was recorded for neutrophils that were exposed to the IgG-  
247 opsonized beads compared to those coated with IgA, which actually inhibited phagocytosis  
248 relative to protein L-coated control beads (Fig. 3D). This further demonstrates that endosomal  
249 TLR activation by viral pathogen-associated molecular patterns (PAMPs) are not required for the  
250 potentiation of NETosis by IgA:virus ICs. As further confirmation, instead of using soluble ICs  
251 as had been done in previous experiments, IC's were immobilized on glass coverslips. Consistent  
252 with all experiments that had been performed using soluble ICs, significantly higher levels of  
253 NETosis were observed when neutrophils were incubated with immobilized IgA:virus ICs  
254 relative to immobilized IgG:virus containing ICs (Fig. 3E). Combined, these data suggest that  
255 phagocytosis is not required for IgA IC-mediated stimulation of NETosis.

256

### 257 **IgA ICs stimulate NADPH oxidase complex (NOX)-dependent suicidal NETosis**

258 The most common and well-characterized type of NETosis is called “suicidal NETosis”, which  
259 results in the death of the cell. More recently, other types of NETosis have been described,

260 including “vital” NETosis (Yipp and Kubes, 2013). Suicidal NETosis requires ROS production  
261 and occurs between 1-3 hours after stimulation, while vital NETosis does not require the  
262 generation of ROS and occurs between 5 and 60 minutes after stimulation (Yipp and Kubes,  
263 2013). To determine whether IgA:virus IC-induced NETosis was vital or suicidal, we first  
264 performed a time-course experiment following stimulation with PMA, a well characterized  
265 stimulant of suicidal/ROS-dependent NETosis, or IgA:IAV ICs for 30, 90 or 180 minutes (Fig.  
266 4A). A significant increase in NETosis was observed following incubation with IgA:IAV ICs for  
267 180 minutes, consistent with suicidal NETosis. Unsurprisingly, PMA – a far more potent  
268 stimulant, significantly induced NETosis beginning at 90 min after stimulation (Fig. 4A).  
269 Conversely, to inhibit the production of ROS, a small molecule inhibitor of the NOX complex,  
270 diphenyleneiodonium chloride (DPI), was pre-incubated with neutrophils prior to stimulation  
271 with IgA:IAV ICs. DPI completely inhibited NETosis induced by IgA ICs (Fig. 4B). Together,  
272 these observations demonstrate that IgA:virus ICs stimulate suicidal NET release in a NOX-  
273 dependent manner.

274

### 275 **Virus particles are trapped and inactivated by NETs**

276 In the context of bacterial infections, NETs exert antimicrobial activity by trapping and killing  
277 bacteria with antimicrobial effector proteins associated with NETs. We thus set out to determine  
278 whether NETs were similarly capable of trapping and inactivating virus. Neutrophils were either  
279 left unstimulated or were treated with PMA to induce suicidal NETosis (virus containing ICs  
280 were not used to avoid the confounding issue of having viruses present during induction of  
281 NETosis). IAV was then incubated in wells of stimulated or unstimulated neutrophils, and  
282 unbound virus was washed away. Using immunofluorescence microscopy, we observed that IAV

283 particles become trapped in NETs induced following stimulation with PMA (Fig. 4C). Using  
284 ImageJ software, we quantified GFP pixel density and normalized this to the number of cells  
285 (and/or NETs) per field. Consistent with the stark visual contrast observed in the images,  
286 significantly more virus was associated with PMA-stimulated neutrophils that had undergone  
287 NETosis than unstimulated neutrophils (Fig. 4D).

288 To test whether IAV was inactivated after being trapped in NETs, we used an mNeon reporter  
289 virus (Harding et al., 2017). IAV-mNeon was incubated with unstimulated neutrophils, PMA-  
290 stimulated neutrophils that had undergone NETosis, or PMA-stimulated neutrophils treated with  
291 DNase to digest NETs. DNase digestion specifically allowed us to test whether being trapped in  
292 a NET was necessary for inactivation, or whether factors released by neutrophils during NETosis  
293 were alone sufficient to inactivate IAV (Supplementary Fig. 1, Fig. 4E). After 3h or 6h  
294 incubation, viral media was collected from all wells incubated on Madin Darby Canine Kidney  
295 cells (MDCKs) to quantify remaining infectious virus. Incubation of virus with PMA-stimulated  
296 neutrophils that had undergone NETosis significantly reduced infectivity after 3 h and 6 h  
297 incubation. Interestingly, digestion of NETs produced by PMA-stimulated cells with DNase prior  
298 to addition of virus had no significant impact of infectivity – suggesting that physical contact  
299 with NETs is required for inactivation and that soluble factors released during the process of  
300 NETosis alone are not sufficient to mediated inactivation (Fig. 4E). Taken together, these data  
301 demonstrate the viruses can be trapped and inactivated by NETs.

302

## 303 **DISCUSSION**

304 NETosis has been most extensively studied as an anti-pathogen immune response in the context  
305 of bacterial infections (Papayannopoulos and Zychlinsky, 2009). However, accumulating

306 evidence suggests that NETs have antiviral activity, but can also contribute to the pathogenesis  
307 of viral disease in certain circumstances (Zhu et al., 2018; Jenne and Kubes, 2015; Saitoh et al.,  
308 2012; Cortjens et al., 2016; Sung et al., 2019; Jenne et al., 2013). While pathogens like viruses  
309 and bacteria can trigger NETosis directly as an innate immune mechanism, there is also an  
310 important intersection of neutrophils/NETs and the adaptive immune response, since neutrophils  
311 express Fc receptors capable of recognizing both soluble ICs and antibody-bound cells. Here, we  
312 show that IgA significantly lowers the amount of virus required to trigger NETosis.

313 In the context of IgG, immobilized ICs have been reported to stimulate NETosis via Fc $\gamma$ RIIA.  
314 Soluble ICs were primarily phagocytosed, but could be shifted to stimulate NETosis upon  
315 TLR7/8 activation, which resulted in furin-mediated cleavage and shedding of the Fc $\gamma$ RIIA N-  
316 terminus – inhibiting further phagocytosis (Lood et al., 2017). We observed that IgA ICs did not  
317 simulate phagocytosis, but rather preferentially induced NETosis, even in the absence of TLR  
318 activation. While IgG ICs could stimulate NETosis, the induction of NETosis was notably more  
319 pronounced upon stimulation of neutrophils with IgA ICs.

320 In the context of IAV, bnAbs that bind to the conserved HA stalk domain have become a major  
321 focus for the development of “universal” influenza virus vaccines and monoclonal antibody  
322 prophylactics/therapeutics. Although bnAbs are relatively weak neutralizers of IAV, they confer  
323 protection *in vivo* by potent induction of Fc-dependent effector functions (He et al., 2015;  
324 DiLillo et al., 2014, 2016; He et al., 2017, 2016; Leon et al., 2016; Mullarkey et al., 2016). The  
325 ability of bnAbs to elicit potent effector functions (relative to conventional neutralizing  
326 antibodies that bind to the HA head domain) relies on a unique reciprocal contact model whereby  
327 Fc receptors of immune effector cells bind to the Fc domain of bnAbs bound to HA on target  
328 cells, while HA expressed on target cells in turn binds to sialic acid residues of the effector cell

329 (Leon et al., 2016; He et al., 2016). However, almost everything that is known about the function  
330 of bnAbs has been studied in the context of IgG. Of the other immunoglobulin isotypes, IgA  
331 plays a particularly important role in protection against mucosal viruses. Indeed, local IgA  
332 responses correlate with protection offered by live-attenuated influenza virus vaccines (Ambrose  
333 et al., 2012; Hoft et al., 2017; Ang et al., 2019). A recent Phase I trial of a chimeric HA universal  
334 vaccine candidate reported potent induction of IgA bnAbs after vaccination – further  
335 highlighting the urgent need to understand how antibodies of this isotype contribute to protection  
336 (Nachbagauer et al., 2020; Bernstein et al., 2019). Here, we show that consistent with prior  
337 studies, bnAbs are primarily responsible for induction of Fc $\alpha$ RI-dependent NETosis, likely  
338 because these antibodies also promote the reciprocal binding events between IgA:Fc $\alpha$ RI and  
339 HA:sialic acid described above.

340 Importantly, the ability of IgA ICs to potentiate NETosis was widespread across several different  
341 viruses including IAV, lentiviruses pseudotyped with SARS-CoV-2 S protein, and HIV. Indeed,  
342 this phenomenon could also be recapitulated with IgA-coated beads and extended beyond the  
343 context of infectious diseases to ICs composed of IgA from RA patients in complex with  
344 citrullinated fibrinogen – a common RA autoantigen. Our findings support previous work from  
345 the van Egmond laboratory demonstrating that IgA ICs isolated from synovial fluid of RA  
346 patients also induce NETosis (Aleyd et al., 2016). Previous work by our group has shown that  
347 upon exposure to IgG:IAV ICs, neutrophils undergo ADCP and potently induce ROS. Inhibition  
348 of phagocytosis with cytochalasin D almost completely abolished ROS induction by IgG:IAV  
349 ICs. In contrast, IgA:IAV ICs were able to stimulate ROS even when phagocytosis was inhibited  
350 (Mullarkey et al., 2016). Those observations are in line with the data presented herein showing

351 that IgA:ICs induced neutrophils to undergo ROS-dependent suicidal NETosis in a phagocytosis-  
352 independent manner.

353 In serum, IgA is present at concentration of ~ 82-624 mg/dL, whereas IgG is found at ~ 694-  
354 1803 mg/dl (Gonzalez-Quintela et al., 2008). In the context of HIV, mixed IgG/IgA:HIV ICs  
355 generated using the gp41-specific bnAb 2F5 cooperatively triggered ADCC of HIV-infected  
356 cells by monocytes, but did not act cooperatively to induce ADCP (Duchemin et al., 2018, 2020).  
357 Likewise, we observed no cooperativity in the induction of NETosis when IgA and IgG were  
358 combined at a 1:1 ratio, or at physiological ratios. These results suggest that signaling  
359 downstream of Fc $\gamma$ Rs and Fc $\alpha$ RI lead to distinct effector outcomes in monocytes and  
360 neutrophils.

361 While ICs composed of serum-derived IgA and monomeric monoclonal IgA could both  
362 potentiate NETosis, secretory IgA purified from saliva could not. This is consistent with prior  
363 studies that have demonstrated that the secretory component sterically interferes with binding to  
364 Fc $\alpha$ RI and suggests that IgA-stimulated NETosis is unlikely to occur in the airways where  
365 secretory IgA is enriched, but instead would be expected to take place primarily in tissues and  
366 vasculature (Aleyd et al., 2015).

367 The data presented here demonstrate that NETs can both trap and inactivate virus. This suggests  
368 that they may have a protective antiviral function. We speculate that in individuals who lack  
369 virus-specific IgA, the high concentrations of virus needed to stimulate NETosis might  
370 exacerbate inflammation and potentiate disease, as has been observed for those with COVID-19  
371 (Radermecker et al., 2020; Middleton et al., 2020; Zuo et al., 2020; Barnes et al., 2020).  
372 However, individuals with pre-existing immunity – such as that conferred by vaccines – low

373 levels of IgA-induced NETosis might help to trap and inactivate virus early in infection, thereby  
374 limited virus spread and progression to severe disease.

375 In summary, we report a new antiviral effector function mediated by virus:IgA ICs. The  
376 mechanism through which virus:IgA ICs stimulate NETosis is distinct from, and considerably  
377 more potent than virus alone. Since mice do not express an Fc $\alpha$ R, it will be important to develop  
378 alternative models for *in vivo* studies to determine when IgA:virus IC-mediated NETosis may be  
379 protective, and when it may exacerbate disease.

380

## 381 **MATERIALS AND METHODS**

### 382 **Human Serum and Blood Samples**

383 Human blood samples used to isolate serum antibodies were obtained with permission from  
384 consenting male and female IAV-vaccinated donors, SARS-CoV-2 infected donors, HIV-  
385 positive individuals, and RA patients. Human blood for neutrophil isolations were collected with  
386 permission from consenting healthy male and female donors. All protocols involving human  
387 samples were approved by the Hamilton Integrated Research Ethics Board and the Western  
388 Research Ethics Board. Blood was collected into Ethylenediamine tetra-acetic acid (EDTA)  
389 coated tubes (BD Vacutainer).

### 390 **Neutrophil Isolation**

391 Neutrophils were isolated from the peripheral blood of healthy male and female donors by  
392 density gradient centrifugation as described previously (Mullarkey et al., 2016). Briefly, 3 mL of  
393 room temperature Histopaque 1119 (Sigma-Aldrich) was added to a 15 mL falcon tube, followed  
394 by gentle addition of 3 mL of Histopaque 1077 (Sigma- Aldrich). 6 mL of blood was layered on  
395 top and samples were centrifuged at 930 x g for 30 minutes at room temperature (RT) with no



396 deceleration in an Allegra X-12R centrifuge (Beckman Coulter). The neutrophil layer was  
397 collected between the Histopaque layers and diluted in 4°C PMN buffer (0.5% BSA, 0.3 mM  
398 EDTA in Hank’s balanced salt solution (Sigma-Aldrich)) to a total volume of 50 mL. PMNs  
399 were then centrifuged at 450 x g for 5 minutes at RT. The Supernatant was discarded, and the  
400 cell pellet re-suspended by flicking the tube. To lyse red blood cells, 3 mL of ACK (ammonium-  
401 chloride-potassium) lysis buffer (8.3 g/L NH<sub>4</sub>Cl, 1 g/L KHCO<sub>3</sub>, 0.05 mM EDTA, in sterile  
402 distilled H<sub>2</sub>O) was added to the PMNs and incubated for 3 minutes with agitation every 30  
403 seconds. The PMNs were diluted in 30 mL of PMN buffer and centrifuged at 450 x g for 5  
404 minutes at RT, followed by one additional wash.

#### 405 **Antibody Purification**

406 Heat-inactivated human serum was diluted 1:10 in phosphate buffered saline (PBS) and applied  
407 to a gravity polypropylene flow column (Qiagen) containing 1 mL of Protein G-sepharose resin  
408 (Invitrogen) to purify IgG. Flow through sera was then applied to a gravity flow column  
409 containing 1 mL Peptide M-sepharose resin (InvivoGen) to purify IgA. Columns were washed  
410 with two column volumes of PBS. IgG and IgA were eluted with 0.1 M glycine-HCl buffer (pH  
411 2.7) into 2 M Tris-HCl neutralizing buffer (pH 10). Antibodies were concentrated and re-  
412 suspended in PBS using 30 kDa cutoff Macrosep Advanced Centrifugal Devices (Pall  
413 Corporation). To purify monoclonal antibodies, clarified cell culture supernatants were applied  
414 directly to Protein G-sepharose columns prior to washing and elution.

#### 415 **Monoclonal Antibodies**

416 The variable light and heavy chain sequences of KB2 and 29E3 antibodies (Manicassamy et al.,  
417 2010; Heaton et al., 2013) were cloned into cloned into pFuse vectors (pFUSE-hIgG1-Fc2 and  
418 pFUSE2ss-CLIg-hK, Invivogen). KB2 binds to the stalk domain of H1 viruses, while 29E3

419 antibody is specific to the head domain of A/California/04/09 (Cal/09). HEK293T cells co-  
420 transfected with pFUSE plasmids according to manufacturer's recommendations and were  
421 subsequently purified from supernatants using Protein G-sepharose columns, as described  
422 above.

### 423 **Cells and Viruses**

424 Madin Darby Canine Kidney (MDCK) cell were grown in Dulbecco modified Eagle medium  
425 (DMEM) containing 10% fetal bovine serum (FBS) (Gibco), 2 mM L- and 100 U/mL penicillin-  
426 streptomycin (Thermo Fisher). At 100% confluency MDCK cells were infected for one hour  
427 with A/California/04/2009 H1N1 (kind gift of Dr. Peter Palese, Icahn School of Medicine at  
428 Mount Sinai, New York, NY) in 1x minimum essential medium (MEM, Sigma Aldrich)  
429 supplemented with 2 mM L-glutamine, 0.24% sodium bicarbonate, 20 mM HEPES (4-(2-  
430 hydroxyethyl)-1-piperazineethanesulfonic acid), MEM amino acids solution (Sigma Aldrich),  
431 MEM vitamins solution (Sigma Aldrich), 100 U/mL penicillin-streptomycin (Thermo Fisher),  
432 and 0.42% bovine serum albumin (Sigma Aldrich). Cells were then washed with PBS and media  
433 was replaced. Cells were left for 72 hours and supernatant was collected. A/ Puerto Rico/8/1934/  
434 H1N1-mNeon (PR8-mNeon, which was a kind gift from the laboratory of Dr. Nicholas Heaton  
435 (Duke University, Durham, NC) (Harding et al., 2017), was propagated in 10- day- old  
436 embryonated chicken eggs as per standard protocols (WHO, 2011).

### 437 **Influenza Virus Purification**

438 Clarified supernatants from IAV-infected MDCK cells were layered on top of 8 mL 20% sucrose  
439 (Bioshop) in NTE buffer (0.5 M NaCl, 10 mM Tris-HCl, 1 mM EDTA, pH 7.5) inside Ultra-  
440 Clear Ultracentrifuge tubes (Beckman Coulter). Samples were spun at 76,650 x g for 2 hours at  
441 4° C inside a SW 32i rotor using an Optima L-90K Ultracentrifuge (Beckman Coulter). Purified

442 virus was quantified using a bicinchoninic acid assay (BCA) Protein Assay Kit (Pierce  
443 Biotechnology) according to the manufacturer's instructions, and by hemagglutination assay.

#### 444 **Pseudotyped Lentivirus Production**

445 HIV-1 X4 gp120 pseudotyped lentiviruses were prepared described previously (Zahoor et al.,  
446 2014). Briefly, HEK293T cells were cultured in DMEM supplemented with 10% fetal bovine  
447 serum, L-glutamine, 100U/ml penicillin and streptomycin and maintained in 5% CO<sub>2</sub> at 37°C.  
448 Briefly, 5 x10<sup>5</sup> cells were seeded onto 6-well plates in one day prior to transfection. Cells were  
449 co-transfected on the next day at 70-80% confluency with pLenti-CMV-GFP-Puro (1.5µg) along  
450 with pEnv<sub>HXB</sub> (0.5µg) and psPAX2 (1µg) plasmids. Medium was changed 24h post-transfection.  
451 Supernatant was then harvested, filtered with a 0.22 micron filters (Millipore) and titered as  
452 described previously (Zahoor et al., 2014). The virus was stored at -80°C until use.

453 SARS-CoV-2 S protein pseudotyped lentiviruses were produced as described by Crawford et al.  
454 (Crawford et al., 2020) and the following reagents were obtained through BEI resources, NIAID,  
455 NIH: SARS-Related Coronavirus 2, Wuhan-Hu-1 Spike-Pseudotyped Lentiviral Kit, NR-52948.

456 In brief, HEK293T cells seeded in 15cm dishes at 1.1x10<sup>7</sup> cells/mL in 15 mL of standard  
457 DMEM. 16- 24 hours post seeding, cells were co-transfected with HDM-nCoV-Spike-IDTopt-  
458 ALAYT, pHAGE-CMV-Luc2-IRES-ZsGreen-W (BEI catalog number NR-52516) , HDM-  
459 Hgpm2 (BEI catalog number NR-52517) HDM-tat1b ( BEI catalog number NR-52518) , pRC-  
460 CMV-Rev1b (BEI catalog NR-52519) . 18-24 hours post transfection the media was replaced  
461 with full DMEM. 60 hours post transfection, the supernatant was collected and filtered with a  
462 0.45 µm filter and stored at -80 degrees. For purification, 40 mL of supernatant was  
463 concentration by spinning at 19, 400 rpm for 2 hours. The resulting pellet was resuspended in

464 400µl of HBSS, followed by 15 mins of continuous vortex at RT. Protein concentration was  
465 confirmed by BCA.

#### 466 **Coating Polystyrene Microspheres with Protein L and Polyclonal Antibody**

467 Fluorescent carboxylate microspheres, 0.5µm (Polysciences) were coated with Protein L  
468 (Thermo Scientific), followed by polyclonal IgA or IgG. The polystyrene microspheres were first  
469 washed with 1X PBS and centrifuged at 13 523 x g. The PBS wash was repeated and then the  
470 microspheres were incubated at RT with 750 µg of Protein L for 4 hours with gentle mixing.  
471 Following another PBS wash, 300 µg of polyclonal IgA was added to the microspheres and left  
472 to incubate at RT with gentle mixing overnight. Following this incubation, the microspheres  
473 were centrifuged at 13 523 x g for ten minutes, and the resulting pellet was resuspended in 1 mL  
474 of PBS and incubated with for 30 minutes with gentle mixing at RT. Following the final  
475 incubation, the microspheres were centrifuged at 13 523 x g for 5 minutes and resuspended in  
476 500 µL of PBS.

#### 477 **Neutrophil Stimulation with Soluble ICs**

478 15 mm glass coverslips were placed inside wells of a sterile 24-well plate and  $4.0 \times 10^5$  PMNs  
479 were added to each well and allowed to settle for 1 hour. For IAV:polyclonal Ab stimulations,  
480 mixtures of 25 µg Cal/09 ( $2^{10}$  HAU) and 50 µg/mL polyclonal IgG or IgA antibody were  
481 incubated for 30 minutes at 4°C before addition to PMNs. ICs containing monoclonal HA stalk  
482 (KB2) or head-binding (29E3) antibodies were generated at a 2:1 ratio of antibody to virus (100  
483 µg/ml and 50 µg/ml, respectively) and allowed to incubate for 30 minutes at RT prior to  
484 stimulation of PMNs. To test the ability of ICs generated with salivary IgA to stimulate NETosis,  
485 matched salivary IgA and serum IgA was purified from the saliva of four healthy donors using  
486 peptide M columns. ICs containing 100 µg/well of serum derived monomeric IgA or salivary

487 IgA and 50  $\mu\text{g}$ /well of Cal/09 were allowed to form by incubation at RT 30 minutes. HIV-  
488 specific ICs were generated by purifying IgA from the serum of 3 HIV-1 positive donors. ICs  
489 were formed by incubating 100  $\mu\text{g}/\text{mL}$  of polyclonal IgA and 50  $\mu\text{g}/\text{mL}$  of HIV-1 gp120  
490 pseudotyped lentiviruses for 30 minutes at room temperature. SARS-CoV-2 ICs were generated  
491 using antibodies purified from the convalescent sera of an individual who had been infected with  
492 SARS-CoV-2. ICs were formed by incubating 100  $\mu\text{g}/\text{mL}$  of polyclonal IgA and 12.5  $\mu\text{g}/\text{mL}$  of  
493 pseudotyped spike lentiviruses for 30 minutes at room temperature. For RA samples, immune  
494 complexes were formed by incubating 50  $\mu\text{g}/\text{well}$  of citrullinated human fibrinogen (Cayman  
495 Chemicals) with 100  $\mu\text{g}/\text{well}$  of polyclonal IgA or IgG for 30 minutes at RT. Stimulation of IgA-  
496 coated beads was performed by incubating neutrophils with  $5.0 \times 10^8$  beads. Antibodies were  
497 purified from the sera donors diagnosed with RA or healthy donors as described above.  
498 Antibodies/viruses/ICs were then incubated with PMNs for 3 hours at  $37^\circ\text{C}$  before being fixed  
499 with 3.7% paraformaldehyde (PFA) (Pierce Protein Biology) prior to staining and imaging.

#### 500 **Immobilized IC Assay**

501 Purified virus was plated on 15mm sterile coverslips in a 24-well plate at  $2\mu\text{g}/\text{mL}$  and incubated  
502 at  $37^\circ\text{C}$  for 18 hours. Wells were washed twice with PBS and 250  $\mu\text{g}$  of either polyclonal IgA or  
503 IgG was added for 30 minutes at  $37^\circ\text{C}$ . Wells were washed twice with PBS prior to the addition  
504 of  $4.0 \times 10^5$  PMNs per well. PMNs were incubated for 3 hours at  $37^\circ\text{C}$ , fixed and stained as  
505 described above.

#### 506 **Fc $\alpha$ RI Blockade**

507 15 mm glass coverslips were placed inside wells of a sterile 12-well plate and  $4.0 \times 10^5$  PMNs  
508 were added to each well in a total volume of 500  $\mu\text{L}$  and allowed to settle for 1 hour. To block  
509 Fc $\alpha$ RI, 20  $\mu\text{g}/\text{mL}$  of mouse anti-human CD89 antibody (AbD Serotec) was added to neutrophils

510 for 20 minutes at 4°C. PMNs were then stimulated with various conditions for 3 hours at 37°C  
511 before being fixed with 3.7% paraformaldehyde (PFA) and stored at 4°C until staining.

### 512 **Fluorescence Microscopy and Quantification of NETosis**

513 Cells were fixed with 3.7% PFA (Pierce Protein Biology) at 4°C, washed in PBS three times and  
514 then permeabilized using 0.5% Triton X-100 (Thermo Scientific) in PBS-T. Fixed and  
515 permeabilized cells were then blocked for 30 minutes at RT in blocking buffer (10% FBS in  
516 PBS-T). Cells were incubated with primary rabbit anti-neutrophil elastase antibody (Abcam) at a  
517 1:100 dilution for one hour at room temperature. Coverslips were washed with PBS three times  
518 and then incubated with Alexa Fluor 488-conjugated donkey anti-rabbit antibody (Molecular  
519 Probes) diluted as per manufacturer's recommendation (2 drops/mL) for 1 hour at RT, protected  
520 from light. Coverslips were then washed with PBS three times. 1 µg/mL Hoechst 33342,  
521 trihydrochloride, trihydrate (Life Technologies) was incubated for 5 minutes, at RT, protected  
522 from light. Cells were washed with PBS three times and coverslips were mounted onto glass  
523 slides in EverBrite Mounting Medium (Biotium). Cells were imaged using an EVOS FL  
524 microscope (Life Technologies). 5 random fields per condition were captured at 20x  
525 magnification. NETosis was quantified by counting cells which had decondensed chromatin  
526 colocalized with neutrophil elastase. % NETosis was expressed as number of cells that had  
527 undergone NETosis / number of total cells.

### 528 **Influenza Viral Particle Trapping and Inactivation in NETs**

529 Sterilized glass coverslips were placed in a 24 well plate, and neutrophils at  $4.0 \times 10^5$  cells/well  
530 were allowed to settle for 1 hour prior to stimulation. Neutrophils were stimulated with PMA for  
531 3 hours at 37 °C, 5 % CO<sub>2</sub>. Cal/09 at  $10^5$  PFU/mL was then allowed to settle on the pre-formed  
532 NETs for 3 hours at 37°C, following this incubation cells were fixed with 3.7% PFA (Pierce

533 Protein Biology). To stain coverslips for immunofluorescent imaging coverslips were treated in  
534 the same was as previously described. Primary antibodies used included primary rabbit anti-  
535 neutrophil elastase antibody (Abcam, 1:100 dilution), 6F12 generated from in house-hybridomas  
536 at 1  $\mu\text{g}/\text{mL}$ . Secondary antibodies included Alexa Fluor 488 conjugated donkey anti-mouse  
537 antibody (Molecular Probes, 1:4000) and Alexa Flour 594 donkey anti-rabbit (Molecular Probes,  
538 1:4000). Coverslips were incubated with 1  $\mu\text{g}/\text{mL}$  Hoechst 33342, trihydrochloride, trihydrate  
539 (Life Technologies) to probe for DNA. Cells were visualized and imaged using GFP (Ex 470  
540 nm/Em 525 nm) and DAPI (Ex 360 nm/Em 447 nm), Texas Red (Ex 585/ Em 624) color cubes  
541 in the EVOS FL microscope (Life Technologies). To evaluate inactivation,  $10^5$  PFU/mL of PR8  
542 mNeon was incubated with PMA stimulated neutrophils for 3-6 hours. 25 units/mL of DNaseI  
543 (Thermo Fisher) was added to PMA stimulated neutrophils and was allowed to incubate for 90  
544 minutes to digest NETs. Samples were collected and stored at -80 until further use. Prior to virus  
545 quantification, MDCK cells were seeded in 24-well plates and used when 90% confluent.  
546 Sample was diluted 1:10 in 1x minimum essential medium (MEM, Sigma Aldrich) supplemented  
547 with 2 mM L-glutamine, 0.24% sodium bicarbonate, 20 mM HEPES (4-(2-hydroxyethyl)-1-  
548 piperazineethanesulfonic acid), MEM amino acids solution (Sigma Aldrich), MEM vitamins  
549 solution (Sigma Aldrich), 100 U/mL penicillin-streptomycin (Thermo Fisher), and 0.42% bovine  
550 serum albumin (Sigma Aldrich), before being added to cells. After 1 hour this was replaced with  
551 DMEM containing 10% FBS (Gibco), 2 mM L-glutamine and 100 U/mL penicillin-streptomycin  
552 (Thermo Fisher). The number of fluorescent cells was assessed 12 hours post-infection. Cells  
553 were fixed with PFA and incubated with 1  $\mu\text{g}/\text{mL}$  Hoechst 33342, trihydrochloride, trihydrate  
554 (Life Technologies). 5-fields per condition were taken on the EVOS FL microscope, and %  
555 infectivity was determined as the number of infected cells / the total number of cells.

## 556 **Phagocytosis Assay of Polyclonal Antibody-Coated Microspheres**

557 This protocol was performed as previously described (Mullarkey et al., 2016). Briefly,  
558 fluorescent carboxylate microspheres 0.5 $\mu$ m (Polysciences) were coated with protein L and  
559 polyclonal IgA or IgG and were incubated with neutrophils at a 500:1 ratio at 37°C for 15  
560 minutes with gentle mixing. This was followed by centrifugation at 2000 rpm for 10 minutes.  
561 Cells were washed twice with PBS before being plated in a 96-well plate. Fluorescence was  
562 measured with the SpectraMax i3 plate reader at 526nm (Molecular Devices).

## 563 **NOX Assay**

564 Neutrophils were purified as described above and allowed to settle on glass coverslips for 1 hour  
565 at 37 °C. While settling, neutrophils were incubated with 20  $\mu$ m of Diphenyleneiodonium  
566 chloride (DPI) (Sigma-Aldrich) a neutrophil NADPH oxidase inhibitor. Neutrophils were then  
567 stimulated with IgA:IAV ICs or PMA (0.1 mg/mL, Sigma-Aldrich) as a positive control and DPI  
568 was maintained in the media. Cells were then fixed with 3.7% paraformaldehyde (PFA) (Pierce  
569 Protein Biology) and stored at 4°C until staining and imaging.

## 570 **Statistics**

571 Graphs and statistical analyses were generated using Graphpad Prism v9 (Graphpad Software,  
572 San Diego, CA). A *P* value of < 0.05 was considered to be significant across all experiments.

## 573 **FIGURE LEGENDS**

574 **Figure 1. IgA:IAV ICs potentiate NETosis.** (A-F) Primary human neutrophils were isolated  
575 from the peripheral blood of healthy donors (n=3 or 4), and stimulated with PMA, monoclonal or  
576 polyclonal IgG or IgA antibodies, or ICs for 3 hours as shown. NETosis was assessed by  
577 immunofluorescence microscopy after co-staining for DNA (DAPI) and neutrophil elastase. (A)  
578 Representative images are shown (20x). Bars depict 200  $\mu$ m. Insert (a) shows area with NETs,



579 insert (b) shows area with intact neutrophils. (B) The percentage of cells that had undergone  
580 NETosis (defined by typically NET morphology and co-staining of DAPI + neutrophil elastase)  
581 were quantified in a blinded manner from 5 fields in 4 independent experiments. (C, D) The  
582 assay was repeated using monoclonal antibodies, (C) KB2 and (D) 29E3, which bind the HA  
583 stalk and head domain of Cal/09, respectively. (E, F) To determine the phenotype of mixed  
584 IgG/IgA ICs, polyclonal IgG and IgA were mixed with Cal/09 at a (E) 1:1 or (F) at the ratio  
585 naturally found in serum. For all experiments, percent NETosis was normalized to unstimulated  
586 neutrophils. Three or four independent neutrophil donors were used for each experiment. Means  
587 and standard error (SEM) of independent experiments are shown. Statistical significance was  
588 determined using one-way ANOVA with Tukey post-hoc test. \*, $P < 0.05$ ; \*\*, $P < 0.01$ .

589

590 **Figure 2. Potentiation of NETosis by IgA ICs is not an IAV-specific phenomenon. (A)**

591 Purified SARS-CoV-2 spike pseudotyped lentivirus was titrated onto primary human neutrophils  
592 from healthy donors ( $n = 3$ ) and incubated for 3 hours prior to staining for DNA (DAPI) and  
593 neutrophil elastase. (B) Polyclonal IgA was isolated from serum of a convalescent COVID-19  
594 donor and from pre-pandemic donor serum (SARS-CoV-2 seronegative) and incubated with  
595 spike pseudotyped-lentivirus to form ICs prior to stimulation of neutrophils isolated from healthy  
596 donors ( $n=3$ ) for 3 hours prior to staining for DNA (DAPI) and neutrophil elastase. (C) ICs were  
597 formed with IgA purified from serum of HIV-positive individuals ( $n=3$ ) and HIV-1 X4 gp120  
598 (HxB2) pseudotyped lentivirus. Neutrophils were stimulated for 3 hours prior to staining for  
599 DNA (DAPI) and neutrophil elastase. (D) Cells were stimulated with ICs containing IgA purified  
600 from the serum of healthy donors ( $n=5$ ) or RA patients ( $n=5$ ) in complex with citrullinated  
601 fibrinogen. NETosis was quantified in a blinded manner from 5 fields per condition. Mean and

602 SEM of independent experiments are shown. P-values were determined by one-way ANOVA  
603 with Tukey post-hoc test. \*,  $P < 0.05$ , \*\*,  $P < 0.01$ .

604

605 **Figure 3. IgA ICs induce NETosis via Fc $\alpha$ RI engagement, independently of TLR signaling**

606 **and phagocytosis.** (A) Primary human neutrophils were stimulated for 3 hours with

607 antibody:IgA ICs generated from matched salivary IgA (sIgA) and serum IgA of healthy IAV-

608 exposed donors (n=4). (B) Primary human neutrophils were incubated with an anti-CD89

609 (Fc $\alpha$ RI) antibody prior to stimulation with IgG:IgA or IgA:IgA ICs (n=3) (C) Primary human

610 neutrophils were stimulated with polyclonal IgA, polystyrene beads coated with Protein L, or

611 polystyrene beads coated with protein L and IgA. For all experiments, NETosis was assessed by

612 immunofluorescence microscopy analysis of cells co-stained for DNA (DAPI) and neutrophil

613 elastase. NETosis in stimulated conditions was normalized to untreated cells (n=6). (D)

614 Fluorescent polystyrene beads were coated with protein L, followed by either polyclonal IgG or

615 IgA. Human neutrophils were isolated and incubated with the beads at a 500 beads/cell ratio.

616 After washing, phagocytosis of beads was measured using a SpectraMax i3 plate reader

617 (Molecular Devices) (n=3). (E) Purified Cal/09 was immobilized on glass coverslips prior to the

618 addition of IgG or IgA. Primary human neutrophils were added to wells for 3 hours before being

619 fixed and stained for quantification (n=3). Mean and SEM of independent experiments are

620 shown. Statistical significance was evaluated by one-way ANOVA and Tukey post-hoc test. \*,  $P$

621  $< 0.05$ ; \*\*,  $P < 0.01$ .

622

623 **Figure 4. Influenza virus particles are trapped and inactivated by NETs released via**

624 **suicidal NETosis.** (A) Primary human neutrophils were stimulated with PMA, IgG:IgA, or

625 IgA:IAV ICs for 30, 90 and 180 minutes prior to fixation and staining for DNA (DAPI) and  
626 neutrophil elastase to quantify NETosis. (B) Primary human neutrophils were incubated with  
627 DPI, a NOX inhibitor, prior to 3 hours of simulation with IgA:IAV ICs (n=3). (C) Neutrophils  
628 were stimulated with PMA for 90 minutes before the addition 105 PFU/ well of IAV. Virus was  
629 incubated with the NETs for 3 hours and then fixed and stained with anti-hemagglutinin  
630 antibodies (6F12), DNA (DAPI) and neutrophil elastase. Immunofluorescence microscopy was  
631 used to measure the co-localization of viral particles (green) with NETs composed of DNA  
632 (blue) coated with neutrophil elastase (red) (n=3) (D) Quantification of the raw integrated GFP  
633 density was measured using ImageJ and normalized to the number of cells per field. (E)  
634 Neutrophils were stimulated with PMA prior to the addition of an IAV expressing an mNeon  
635 reporter. Virus was incubated on intact NETs or NETs that had been digested with DNase (n=3).  
636 Contents of wells were collected and MDCK cells were infected for 8 hours to measure residual  
637 infectivity. Mean and  $\pm$  SEM are shown. Statistical significance was evaluated using one-way  
638 ANOVA with Tukey post-hoc test. \*P < 0.05; \*\*P < 0.01.

639

640 **Supplementary Figure 1. NETs digested with DNase.** Neutrophils were isolated and  
641 stimulated with IgA:IAV IC's or PMA for 3 hours. DNase was added at 25 units/mL and  
642 allowed to incubate for 90 min prior to fixation and staining.

#### 643 **ACKNOWLEDGEMENTS**

644 This work was funded by grants from the Canadian Institutes of Health Research (CIHR)  
645 (M.S.M.), the Weston Family Microbiome Initiative (M.S.M.), The Lung Association/Ontario  
646 Thoracic Society Grants-in-Aid (M.S.M.), and the Michael G. DeGroote Institute for Infectious  
647 Disease Research (M.S.M.). M.S.M. was also supporting, in part, by a CIHR New Investigator

648 Award and an Ontario Early Researcher Award (ERA). H.D.S. was supported, in part, by a  
649 CIHR Master's Award and an Ontario Graduate Scholarship. The authors thank Dr. Joe Mymryk  
650 for critical reading of the manuscript and helpful suggestions.

651  
652 **REFERENCES**

- 653  
654 Aleyd, E., M. Al, C.W. Tuk, C.J. van der Laken, and M. van Egmond. 2016. IgA Complexes in  
655 Plasma and Synovial Fluid of Patients with Rheumatoid Arthritis Induce Neutrophil  
656 Extracellular Traps via Fc $\alpha$ RI. *J. Immunol.* 197:4552–4559.  
657 doi:10.4049/jimmunol.1502353.  
658 Aleyd, E., M.H. Heineke, and M. van Egmond. 2015. The era of the immunoglobulin A Fc  
659 receptor Fc $\alpha$ RI; its function and potential as target in disease. *Immunol. Rev.* 268:123–138.  
660 doi:10.1111/imr.12337.  
661 Aleyd, E., M.W.M. van Hout, S.H. Ganzevles, K.A. Hoeben, V. Everts, J.E. Bakema, and M.  
662 van Egmond. 2014. IgA enhances NETosis and release of neutrophil extracellular traps by  
663 polymorphonuclear cells via Fc $\alpha$  receptor I. *J. Immunol.* 192:2374–83.  
664 doi:10.4049/jimmunol.1300261.  
665 Ambrose, C.S., X. Wu, T. Jones, and R.M. Mallory. 2012. The role of nasal IgA in children  
666 vaccinated with live attenuated influenza vaccine. *Vaccine.* 30:6794–6801.  
667 doi:10.1016/J.VACCINE.2012.09.018.  
668 Ang, J.C., B. Wang, J.J.F. Wang, P.Y.F. Zeng, F. Krammer, B.J. Ward, M.L. Russell, M. Loeb,  
669 and M.S. Miller. 2019. Comparative Immunogenicity of the 2014–2015 Northern  
670 Hemisphere Trivalent IIV and LAIV against Influenza A Viruses in Children. *Vaccines.*  
671 7:87. doi:10.3390/vaccines7030087.  
672 Bakema, J.E., and M. van Egmond. 2011. The human immunoglobulin A Fc receptor Fc $\alpha$ RI: a  
673 multifaceted regulator of mucosal immunity. *Mucosal Immunol.* 4:612–24.  
674 doi:10.1038/mi.2011.36.  
675 Barnes, B.J., J.M. Adrover, A. Baxter-Stoltzfus, A. Borczuk, J. Cools-Lartigue, J.M. Crawford,  
676 J. Daßler-Plenker, P. Guerci, C. Huynh, J.S. Knight, M. Loda, M.R. Looney, F. McAllister,  
677 R. Rayes, S. Renaud, S. Rousseau, S. Salvatore, R.E. Schwartz, J.D. Spicer, C.C. Yost, A.  
678 Weber, Y. Zuo, and M. Egeblad. 2020. Targeting potential drivers of COVID-19:  
679 Neutrophil extracellular traps. *J. Exp. Med.* 217. doi:10.1084/jem.20200652.  
680 Bernstein, D.I., J. Guptill, A. Naficy, R. Nachbagauer, F. Berlanda-Scorza, J. Feser, P.C. Wilson,  
681 A. Solórzano, M. Van der Wielen, E.B. Walter, R.A. Albrecht, K.N. Buschle, Y. qing Chen,  
682 C. Claeys, M. Dickey, H.L. Dugan, M.E. Ermler, D. Freeman, M. Gao, C. Gast, J.J.  
683 Guthmiller, R. Hai, C. Henry, L.Y.L. Lan, M. McNeal, A.K.E. Palm, D.G. Shaw, C.T.  
684 Stamper, W. Sun, V. Sutton, M.E. Tepora, R. Wahid, H. Wenzel, T.J. Wohlbold, B.L. Innis,  
685 A. García-Sastre, P. Palese, and F. Krammer. 2019. Immunogenicity of chimeric  
686 haemagglutinin-based, universal influenza virus vaccine candidates: interim results of a  
687 randomised, placebo-controlled, phase 1 clinical trial. *Lancet Infect. Dis.*  
688 doi:10.1016/S1473-3099(19)30393-7.  
689 Brinkmann, V., U. Reichard, C. Goosmann, B. Fauler, Y. Uhlemann, D.S. Weiss, Y. Weinrauch,  
690 and A. Zychlinsky. 2004. Neutrophil Extracellular Traps Kill Bacteria. *Science (80-. ).*

- 691 303:1532–1535. doi:10.1126/science.1092385.
- 692 Camp, J. V., and C.B. Jonsson. 2017. A role for neutrophils in viral respiratory disease. *Front.*  
693 *Immunol.* 8:1. doi:10.3389/fimmu.2017.00550.
- 694 Cortjens, B., O.J. De Boer, R. De Jong, A.F.G. Antonis, Y.S. Sabogal Piñeros, R. Lutter, J.B.M.  
695 Van Woensel, and R.A. Bem. 2016. Neutrophil extracellular traps cause airway obstruction  
696 during respiratory syncytial virus disease. *J. Pathol.* 238:401–411. doi:10.1002/path.4660.
- 697 Crawford, K.H.D., R. Eguia, A.S. Dingens, A.N. Loes, K.D. Malone, C.R. Wolf, H.Y. Chu,  
698 M.A. Tortorici, D. Veessler, M. Murphy, D. Pettie, N.P. King, A.B. Balazs, and J.D. Bloom.  
699 2020. Protocol and reagents for pseudotyping lentiviral particles with SARS-CoV-2 spike  
700 protein for neutralization assays. *Viruses.* 12:13–15. doi:10.3390/v12050513.
- 701 DiLillo, D.J., P. Palese, P.C. Wilson, and J. V Ravetch. 2016. Broadly neutralizing anti-influenza  
702 antibodies require Fc receptor engagement for in vivo protection. *J. Clin. Invest.*  
703 doi:10.1172/JCI84428.
- 704 DiLillo, D.J., G.S. Tan, P. Palese, and J. V Ravetch. 2014. Broadly neutralizing hemagglutinin  
705 stalk-specific antibodies require FcγR interactions for protection against influenza virus in  
706 vivo. *Nat. Med.* 20:143–51. doi:10.1038/nm.3443.
- 707 Duchemin, M., M. Khamassi, X. Lin, D. Tudor, and M. Bomsel. 2018. IgA Targeting Human  
708 Immunodeficiency Virus-1 Envelope gp41 Triggers Antibody-Dependent Cellular  
709 Cytotoxicity Cross-Clade and Cooperates with gp41-Specific IgG to Increase Cell Lysis.  
710 *Front. Immunol.* 9. doi:10.3389/fimmu.2018.00244.
- 711 Duchemin, M., D. Tudor, A. Cottignies-Calamarte, and M. Bomsel. 2020. Antibody-Dependent  
712 Cellular Phagocytosis of HIV-1-Infected Cells Is Efficiently Triggered by IgA Targeting  
713 HIV-1 Envelope Subunit gp41. *Front. Immunol.* 11:1141. doi:10.3389/fimmu.2020.01141.
- 714 Forthal, D.N., and A. Finzi. 2018. Antibody-dependent cellular cytotoxicity in HIV infection.  
715 *AIDS.* 32:2439–2451. doi:10.1097/QAD.0000000000002011.
- 716 Fuchs, T.A., U. Abed, C. Goosmann, R. Hurwitz, I. Schulze, V. Wahn, Y. Weinrauch, V.  
717 Brinkmann, and A. Zychlinsky. 2007. Novel cell death program leads to neutrophil  
718 extracellular traps. *J. Cell Biol.* 176:231–241. doi:10.1083/jcb.200606027.
- 719 Gonzalez-Quintela, A., R. Alende, F. Gude, J. Campos, J. Rey, L.M. Meijide, C. Fernandez-  
720 Merino, and C. Vidal. 2008. Serum levels of immunoglobulins (IgG, IgA, IgM) in a general  
721 adult population and their relationship with alcohol consumption, smoking and common  
722 metabolic abnormalities. *Clin. Exp. Immunol.* 151:42–50. doi:10.1111/j.1365-  
723 2249.2007.03545.x.
- 724 Hai, R., F. Krammer, G.S. Tan, N. Pica, D. Eggink, J. Maamary, I. Margine, R.A. Albrecht, and  
725 P. Palese. 2012. Influenza Viruses Expressing Chimeric Hemagglutinins: Globular Head  
726 and Stalk Domains Derived from Different Subtypes. *J. Virol.* 86:5774–5781.  
727 doi:10.1128/jvi.00137-12.
- 728 Harding, A.T., B.E. Heaton, R.E. Dumm, and N.S. Heaton. 2017. Rationally designed influenza  
729 virus vaccines that are antigenically stable during growth in eggs. *MBio.* 8.  
730 doi:10.1128/mBio.00669-17.
- 731 He, W., C.-J. Chen, C.E. Mullarkey, J.R. Hamilton, C.K. Wong, P.E. Leon, M.B. Uccellini, V.  
732 Chromikova, C. Henry, K.W. Hoffman, J.K. Lim, P.C. Wilson, M.S. Miller, F. Krammer, P.  
733 Palese, and G.S. Tan. 2017. Alveolar macrophages are critical for broadly-reactive  
734 antibody-mediated protection against influenza A virus in mice. *Nat. Commun.* 8:846.  
735 doi:10.1038/s41467-017-00928-3.
- 736 He, W., C.E. Mullarkey, J.A. Duty, T.M. Moran, P. Palese, and M.S. Miller. 2015. Broadly-

- 737 Neutralizing Anti-Influenza Virus Antibodies: Enhancement of Neutralizing Potency in  
738 Polyclonal Mixtures and IgA Backbones. *J. Virol.* doi:10.1128/JVI.03099-14.
- 739 He, W., G.S. Tan, C.E. Mullarkey, A.J. Lee, M.M.W. Lam, F. Krammer, C. Henry, P.C. Wilson,  
740 A.A. Ashkar, P. Palese, and M.S. Miller. 2016. Epitope specificity plays a critical role in  
741 regulating antibody-dependent cell-mediated cytotoxicity against influenza A virus. *Proc.*  
742 *Natl. Acad. Sci.* 113:11931–11936. doi:10.1073/pnas.1609316113.
- 743 Heaton, N.S., V.H. Leyva-Grado, G.S. Tan, D. Eggink, R. Hai, and P. Palese. 2013. In Vivo  
744 Bioluminescent Imaging of Influenza A Virus Infection and Characterization of Novel  
745 Cross-Protective Monoclonal Antibodies. *J. Virol.* 87:8272–8281. doi:10.1128/JVI.00969-  
746 13.
- 747 Heil, F., H. Hemmi, H. Hochrein, F. Ampenberger, S. Akira, G. Lipford, H. Wagner, and S.  
748 Bauer. 2004. Species-Specific Recognition of Single-Stranded RNA via Toll-like Receptor  
749 7 and 8. *Science (80-. )*. 303:1526–1529.
- 750 Herr, A.B., E.R. Ballister, and P.J. Bjorkman. 2003. Insights into IgA-mediated immune  
751 responses from the crystal structures of human Fc $\alpha$ RI and its complex with IgA1-Fc.  
752 *Nature.* 423:614–620. doi:10.1038/nature01685.
- 753 Hill, J.A., J. Al-Bishri, D.D. Gladman, E. Cairns, and D.A. Bell. 2006. Serum autoantibodies that  
754 bind citrullinated fibrinogen are frequently found in patients with rheumatoid arthritis. *J.*  
755 *Rheumatol.* 33:2115–2119.
- 756 Hiroki, C.H., J.E. Toller-Kawahisa, M.J. Fumagalli, D.F. Colon, L.T.M. Figueiredo, B.A.L.D.  
757 Fonseca, R.F.O. Franca, and F.Q. Cunha. 2020. Neutrophil Extracellular Traps Effectively  
758 Control Acute Chikungunya Virus Infection. *Front. Immunol.* 10:3108.  
759 doi:10.3389/fimmu.2019.03108.
- 760 Hoft, D.F., K.R. Lottenbach, A. Blazevic, A. Turan, T.P. Blevins, T.P. Pacatte, Y. Yu, M.C.  
761 Mitchell, S.G. Hoft, and R.B. Belshe. 2017. Comparisons of the Humoral and Cellular  
762 Immune Responses Induced by Live Attenuated Influenza Vaccine and Inactivated  
763 Influenza Vaccine in Adults. doi:10.1128/CVI.00414-16.
- 764 Jenne, C.N., and P. Kubes. 2015. Virus-Induced NETs – Critical Component of Host Defense or  
765 Pathogenic Mediator? *PLoS Pathog.* 11:9–12. doi:10.1371/journal.ppat.1004546.
- 766 Jenne, C.N., C.H.Y. Wong, F.J. Zemp, B. McDonald, M.M. Rahman, P.A. Forsyth, G.  
767 McFadden, and P. Kubes. 2013. Neutrophils recruited to sites of infection protect from  
768 virus challenge by releasing neutrophil extracellular traps. *Cell Host Microbe.* 13:169–180.  
769 doi:10.1016/j.chom.2013.01.005.
- 770 Kolaczowska, E., and P. Kubes. 2013. Neutrophil recruitment and function in health and  
771 inflammation. *Nat. Rev. Immunol.* 13:159–175. doi:10.1038/nri3399.
- 772 Leon, P.E., W. He, C.E. Mullarkey, M.J. Bailey, M.S. Miller, F. Krammer, P. Palese, and G.S.  
773 Tan. 2016. Optimal activation of Fc-mediated effector functions by influenza virus  
774 hemagglutinin antibodies requires two points of contact. *Proc. Natl. Acad. Sci. U. S. A.* 113.  
775 doi:10.1073/pnas.1613225113.
- 776 Lood, C., S. Arve, J. Ledbetter, and K.B. Elkon. 2017. TLR7 / 8 activation in neutrophils impairs  
777 immune complex phagocytosis through shedding of Fc $\gamma$ RIIA. *J. Exp. Med.* 1–17.
- 778 Manicassamy, B., R.A. Medina, R. Hai, T. Tsibane, S. Stertz, E. Nistal-Villán, P. Palese, C.F.  
779 Basler, and A. García-Sastre. 2010. Protection of mice against lethal challenge with 2009  
780 H1N1 influenza A virus by 1918-like and classical swine H1N1 based vaccines. *PLoS*  
781 *Pathog.* 6:e1000745. doi:10.1371/journal.ppat.1000745.
- 782 Middleton, E.A., X.Y. He, F. Denorme, R.A. Campbell, D. Ng, S.P. Salvatore, M. Mostyka, A.

- 783 Baxter-Stoltzfus, A.C. Borczuk, M. Loda, M.J. Cody, B.K. Manne, I. Portier, E.S. Harris,  
784 A.C. Petrey, E.J. Beswick, A.F. Caulin, A. Iovino, L.M. Abegglen, A.S. Weyrich, M.T.  
785 Rondina, M. Egeblad, J.D. Schiffman, and C.C. Yost. 2020. Neutrophil extracellular traps  
786 contribute to immunothrombosis in COVID-19 acute respiratory distress syndrome. *Blood*.  
787 136:1169–1179. doi:10.1182/blood.2020007008.
- 788 Monteiro, R.C., and J.G.J. Van De Winkel. 2003. IgA Fc receptors. *Annu. Rev. Immunol.*  
789 21:177–204. doi:10.1146/annurev.immunol.21.120601.141011.
- 790 Mullarkey, C.E., M.J. Bailey, D.A. Golubeva, G.S. Tan, R. Nachbagauer, W. He, K.E.  
791 Novakowski, D.M. Bowdish, M.S. Miller, and P. Palese. 2016. Broadly neutralizing  
792 hemagglutinin stalk-specific antibodies induce potent phagocytosis of immune complexes  
793 by neutrophils in an Fc-dependent manner. *MBio*. 7:e01624-16. doi:10.1128/mBio.01624-  
794 16.
- 795 Nachbagauer, R., J. Feser, A. Naficy, D.I. Bernstein, J. Guptill, E.B. Walter, F. Berlanda-Scorza,  
796 D. Stadlbauer, P.C. Wilson, T. Aydillo, M.A. Behzadi, D. Bhavsar, C. Bliss, C. Capuano,  
797 J.M. Carreño, V. Chromikova, C. Claeys, L. Coughlan, A.W. Freyn, C. Gast, A. Javier, K.  
798 Jiang, C. Mariottini, M. McMahon, M. McNeal, A. Solórzano, S. Strohmeier, W. Sun, M.  
799 Van der Wielen, B.L. Innis, A. García-Sastre, P. Palese, and F. Krammer. 2020. A chimeric  
800 hemagglutinin-based universal influenza virus vaccine approach induces broad and long-  
801 lasting immunity in a randomized, placebo-controlled phase I trial. *Nat. Med.*  
802 doi:10.1038/s41591-020-1118-7.
- 803 Narasaraju, T., E. Yang, R.P. Samy, H.H. Ng, W.P. Poh, A.A. Liew, M.C. Phoon, N. Van  
804 Rooijen, and V.T. Chow. 2011. Excessive neutrophils and neutrophil extracellular traps  
805 contribute to acute lung injury of influenza pneumonitis. *Am. J. Pathol.* 179:199–210.  
806 doi:10.1016/j.ajpath.2011.03.013.
- 807 Papayannopoulos, V. 2018. Neutrophil extracellular traps in immunity and disease. *Nat. Rev.*  
808 *Immunol.* 18:134–147. doi:10.1038/nri.2017.105.
- 809 Papayannopoulos, V., and A. Zychlinsky. 2009. NETs: a new strategy for using old weapons.  
810 *Trends Immunol.* 30:513–521. doi:10.1016/j.it.2009.07.011.
- 811 Radermecker, C., N. Detrembleur, J. Guiot, E. Cavalier, M. Henket, C. d’Emal, C. Vanwinge, D.  
812 Cataldo, C. Oury, P. Delvenne, and T. Marichal. 2020. Neutrophil extracellular traps  
813 infiltrate the lung airway, interstitial, and vascular compartments in severe COVID-19. *J.*  
814 *Exp. Med.* 217. doi:10.1084/jem.20201012.
- 815 Saitoh, T., J. Komano, Y. Saitoh, T. Misawa, M. Takahama, T. Kozaki, T. Uehata, H. Iwasaki,  
816 H. Omori, S. Yamaoka, N. Yamamoto, and S. Akira. 2012. Neutrophil extracellular traps  
817 mediate a host defense response to human immunodeficiency virus-1. *Cell Host Microbe*.  
818 12:109–116. doi:10.1016/j.chom.2012.05.015.
- 819 Sung, P.S., T.F. Huang, and S.L. Hsieh. 2019. Extracellular vesicles from CLEC2-activated  
820 platelets enhance dengue virus-induced lethality via CLEC5A/TLR2. *Nat. Commun.* 10.  
821 doi:10.1038/s41467-019-10360-4.
- 822 Tan, G.S., F. Krammer, D. Eggink, A. Kongchanagul, T.M. Moran, and P. Palese. 2012. A Pan-  
823 H1 Anti-Hemagglutinin Monoclonal Antibody with Potent Broad-Spectrum Efficacy In  
824 Vivo. *J. Virol.* 86:6179–6188. doi:10.1128/JVI.00469-12.
- 825 Tan, G.S., P.S. Lee, R.M.B. Hoffman, B. Mazel-Sanchez, F. Krammer, P.E. Leon, A.B. Ward,  
826 I.A. Wilson, and P. Palese. 2014. Characterization of a Broadly Neutralizing Monoclonal  
827 Antibody That Targets the Fusion Domain of Group 2 Influenza A Virus Hemagglutinin. *J.*  
828 *Virol.* 88:13580–13592. doi:10.1128/JVI.02289-14.

829 Tate, M.D., Y. Deng, J.E. Jones, P. Gary, A.G. Brooks, P.C. Reading, M.D. Tate, Y. Deng, J.E.  
830 Jones, G.P. Anderson, A.G. Brooks, and P.C. Reading. 2009. Neutrophils Ameliorate Lung  
831 Injury and the Development of Severe Disease during Influenza Infection. *J. Immunol.*  
832 183:7441–7450. doi:10.4049/jimmunol.0902497.

833 Toussaint, M., D.J. Jackson, D. Swieboda, A. Guedán, T.D. Tsourouktsoglou, Y.M. Ching, C.  
834 Radermecker, H. Makrinioti, J. Aniscenko, M.R. Edwards, R. Solari, F. Farnir, V.  
835 Papayannopoulos, F. Bureau, T. Marichal, and S.L. Johnston. 2017. Host DNA released by  
836 NETosis promotes rhinovirus-induced type-2 allergic asthma exacerbation. *Nat. Med.*  
837 23:681–691. doi:10.1038/nm.4332.

838 Veras, F.P., M. Pontelli, C. Silva, J. Toller-Kawahisa, M. de Lima, D. Nascimento, A. Schneider,  
839 D. Caetite, R. Rosales, D. Colon, R. Martins, I. Castro, G. Almeida, M.I. Lopes, M. Benatti,  
840 L. Bonjorno, M. Giannini, R. Luppino-Assad, S. Almeida, F. Vilar, R. Santana, V. Bollela,  
841 M. Martins, C. Miranda, M. Borges, A. Pazin-Filho, L. Cunha, D. Zamboni, F. Dal-Pizzol,  
842 L. Leiria, L. Siyuan, S. Batah, A. Fabro, T. Mauad, M. Dolhnikoff, A. Duarte-Neto, P.  
843 Saldiva, T. Cunha, J.C. Alves-Filho, E. Arruda, P. Louzada-Junior, R. Oliveira, and F.  
844 Cunha. 2020. SARS-CoV-2 triggered neutrophil extracellular traps (NETs) mediate  
845 COVID-19 pathology. *J. Exp. Med.* 217. doi:10.1101/2020.06.08.20125823.

846 WHO | Manual for the laboratory diagnosis and virological surveillance of influenza. 2011.

847 Wright, H.L., R.J. Moots, and S.W. Edwards. 2014. The multifactorial role of neutrophils in  
848 rheumatoid arthritis. *Nat. Rev. Rheumatol.* 10:593–601. doi:10.1038/nrrheum.2014.80.

849 Yipp, B.G., and P. Kubes. 2013. NETosis: how vital is it? *Blood.* 122:2784–94.  
850 doi:10.1182/blood-2013-04-457671.

851 Zahoor, M.A., S. Philip, H. Zhi, and C.-Z. Giam. 2014. NF- B Inhibition Facilitates the  
852 Establishment of Cell Lines That Chronically Produce Human T-Lymphotropic Virus Type  
853 1 Viral Particles. *J. Virol.* 88:3496–3504. doi:10.1128/JVI.02961-13.

854 Zhu, L., L. Liu, Y. Zhang, L. Pu, J. Liu, X. Li, Z. Chen, Y. Hao, B. Wang, J. Han, G. Li, S.  
855 Liang, H. Xiong, H. Zheng, A. Li, J. Xu, and H. Zeng. 2018. High Level of Neutrophil  
856 Extracellular Traps Correlates With Poor Prognosis of Severe Influenza A Infection. *J.*  
857 *Infect. Dis.* doi:10.1093/infdis/jix475.

858 Zuo, Y., S. Yalavarthi, H. Shi, K. Gockman, M. Zuo, J.A. Madison, C. Blair, A. Weber, B.J.  
859 Barnes, M. Egeblad, R.J. Woods, Y. Kanthi, and J.S. Knight. 2020. Neutrophil extracellular  
860 traps in COVID-19. *JCI Insight.* 5. doi:10.1172/jci.insight.138999.

861



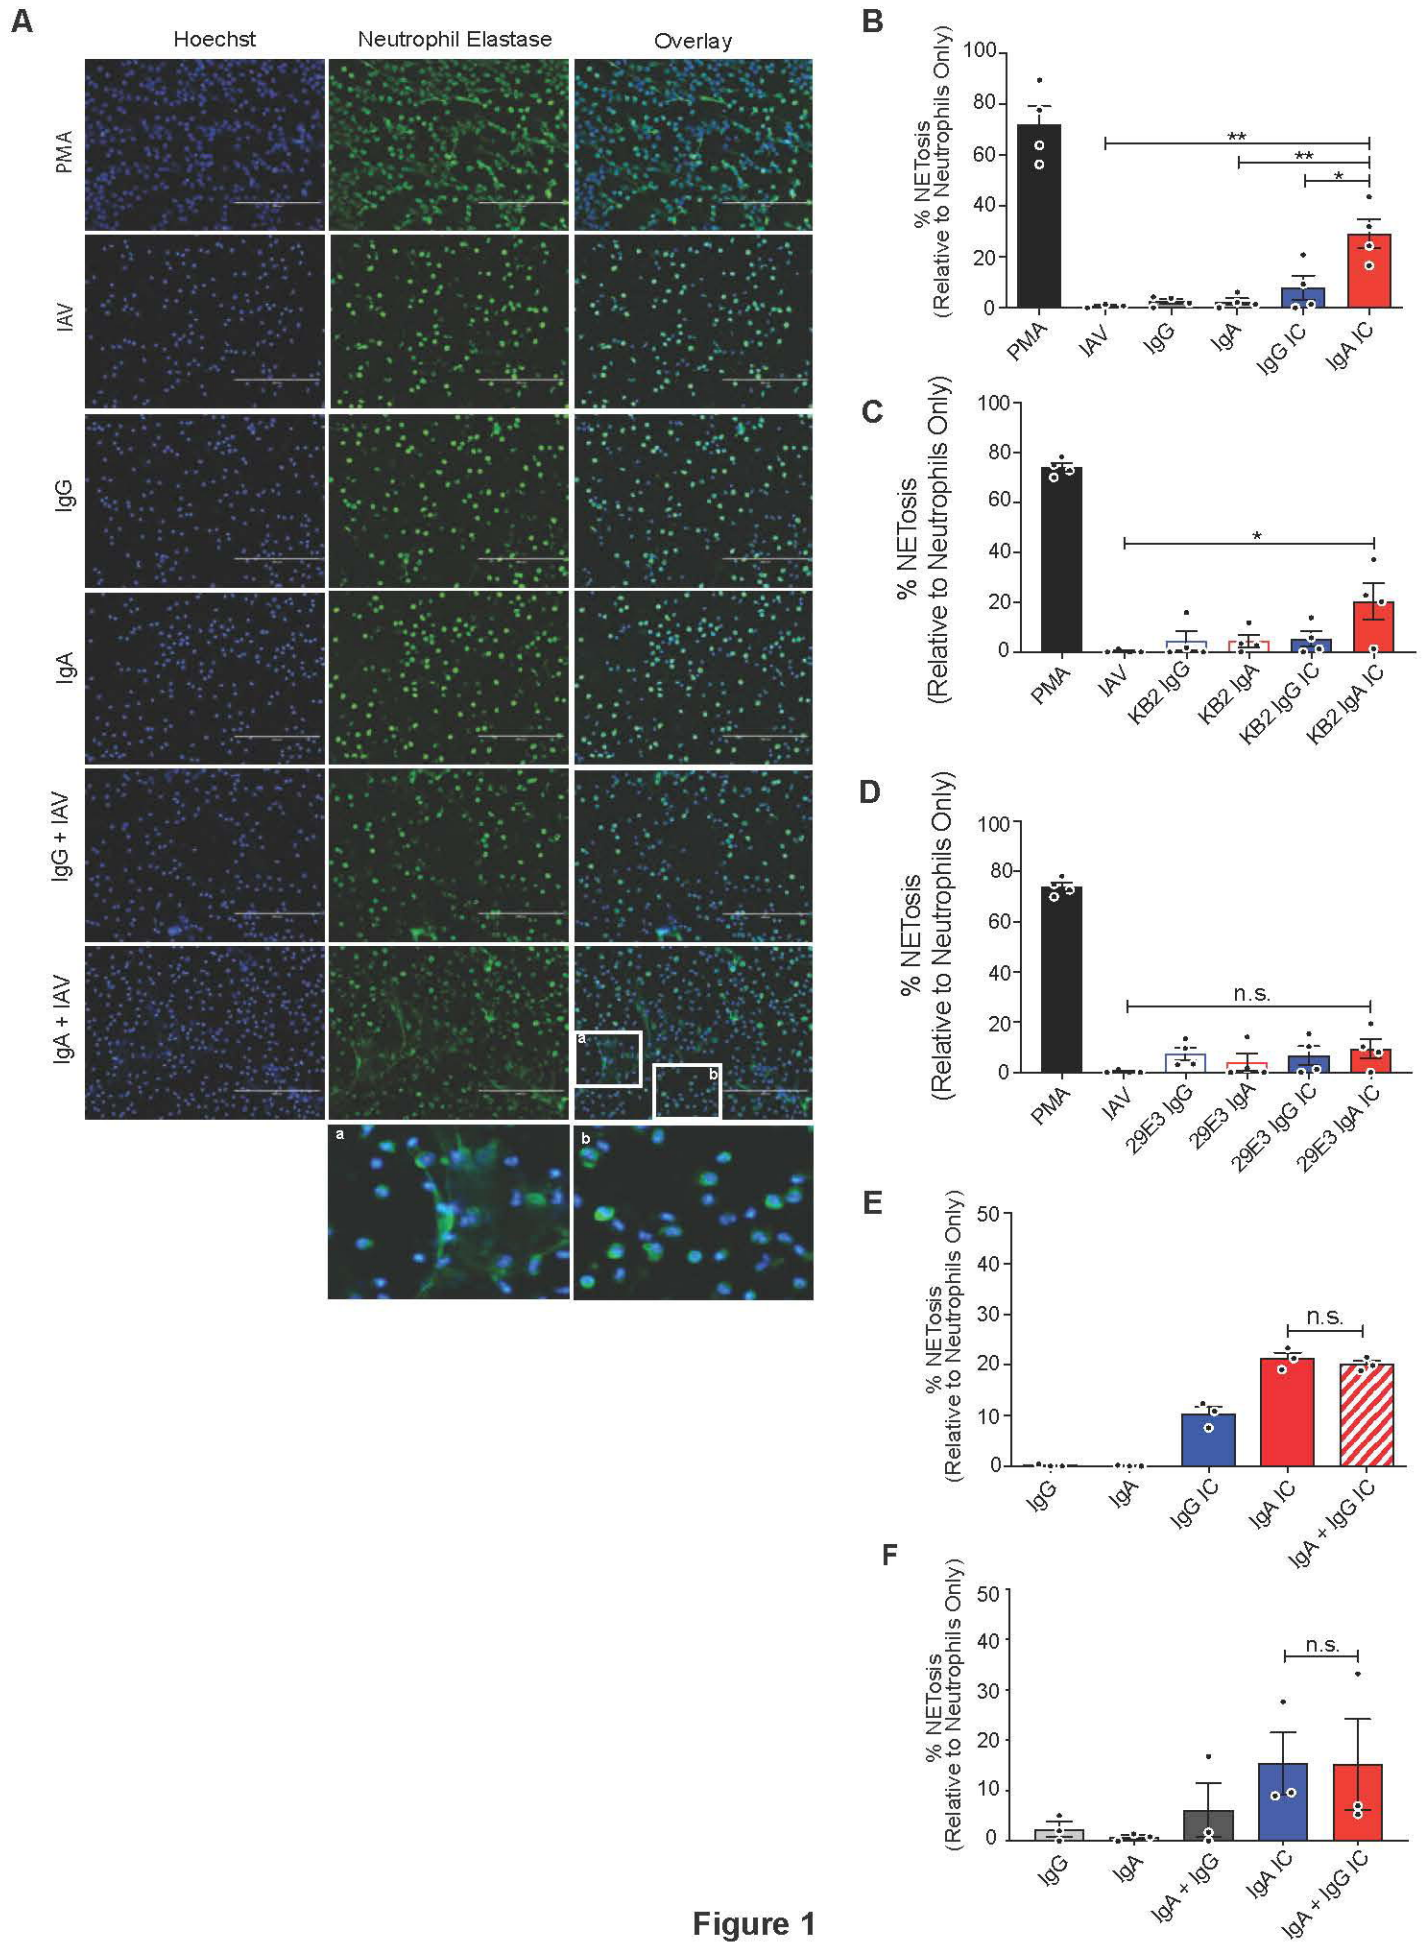

Figure 1

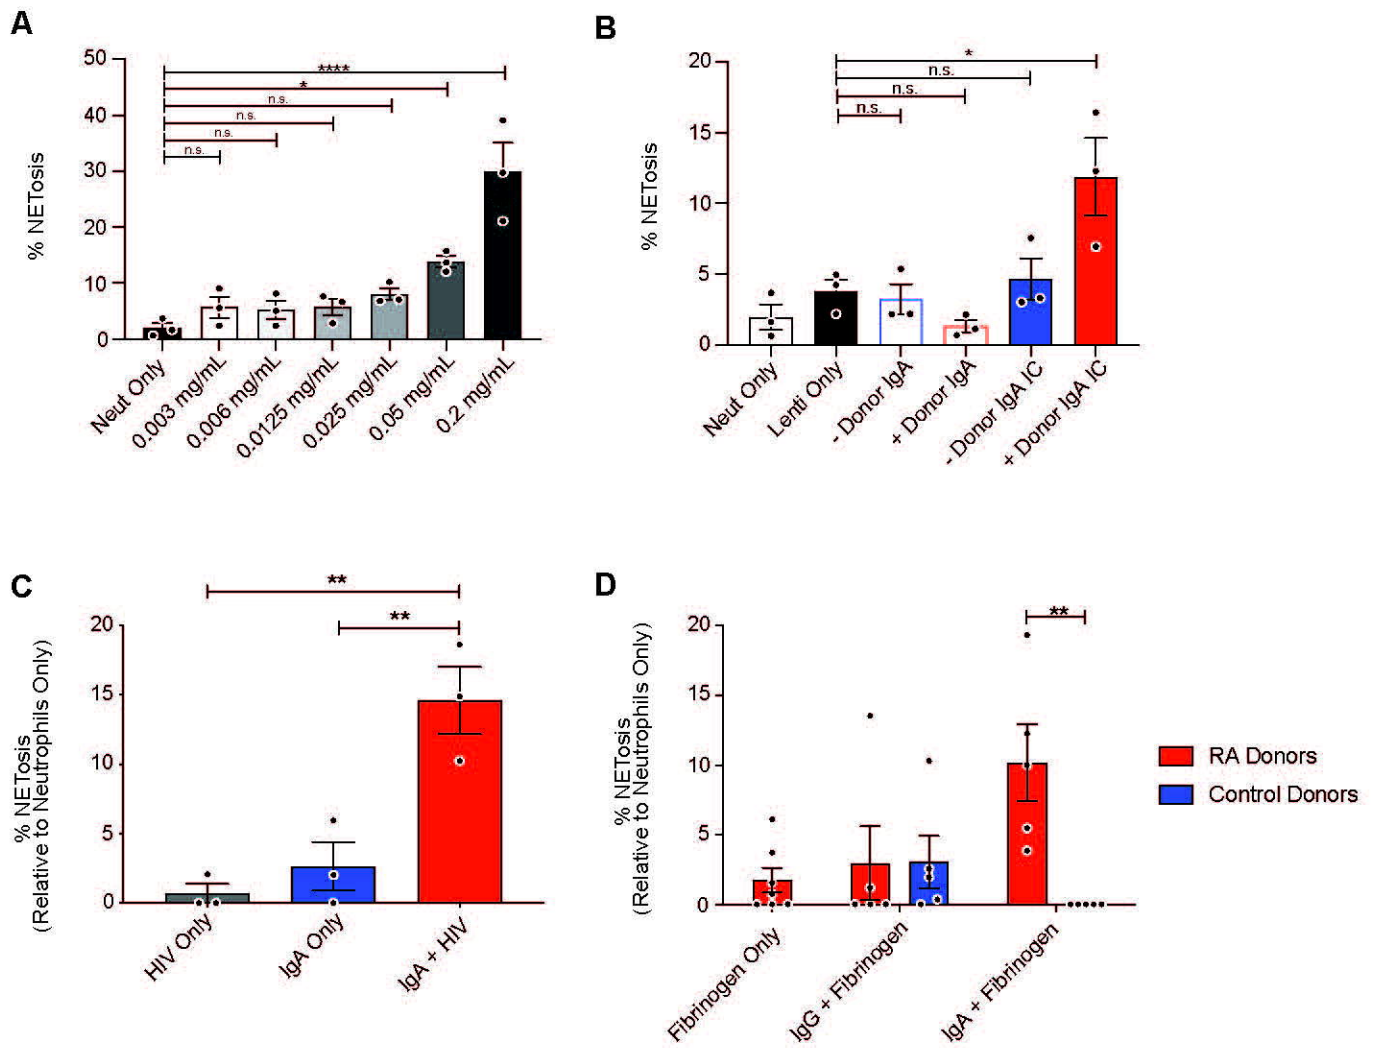

Figure 2

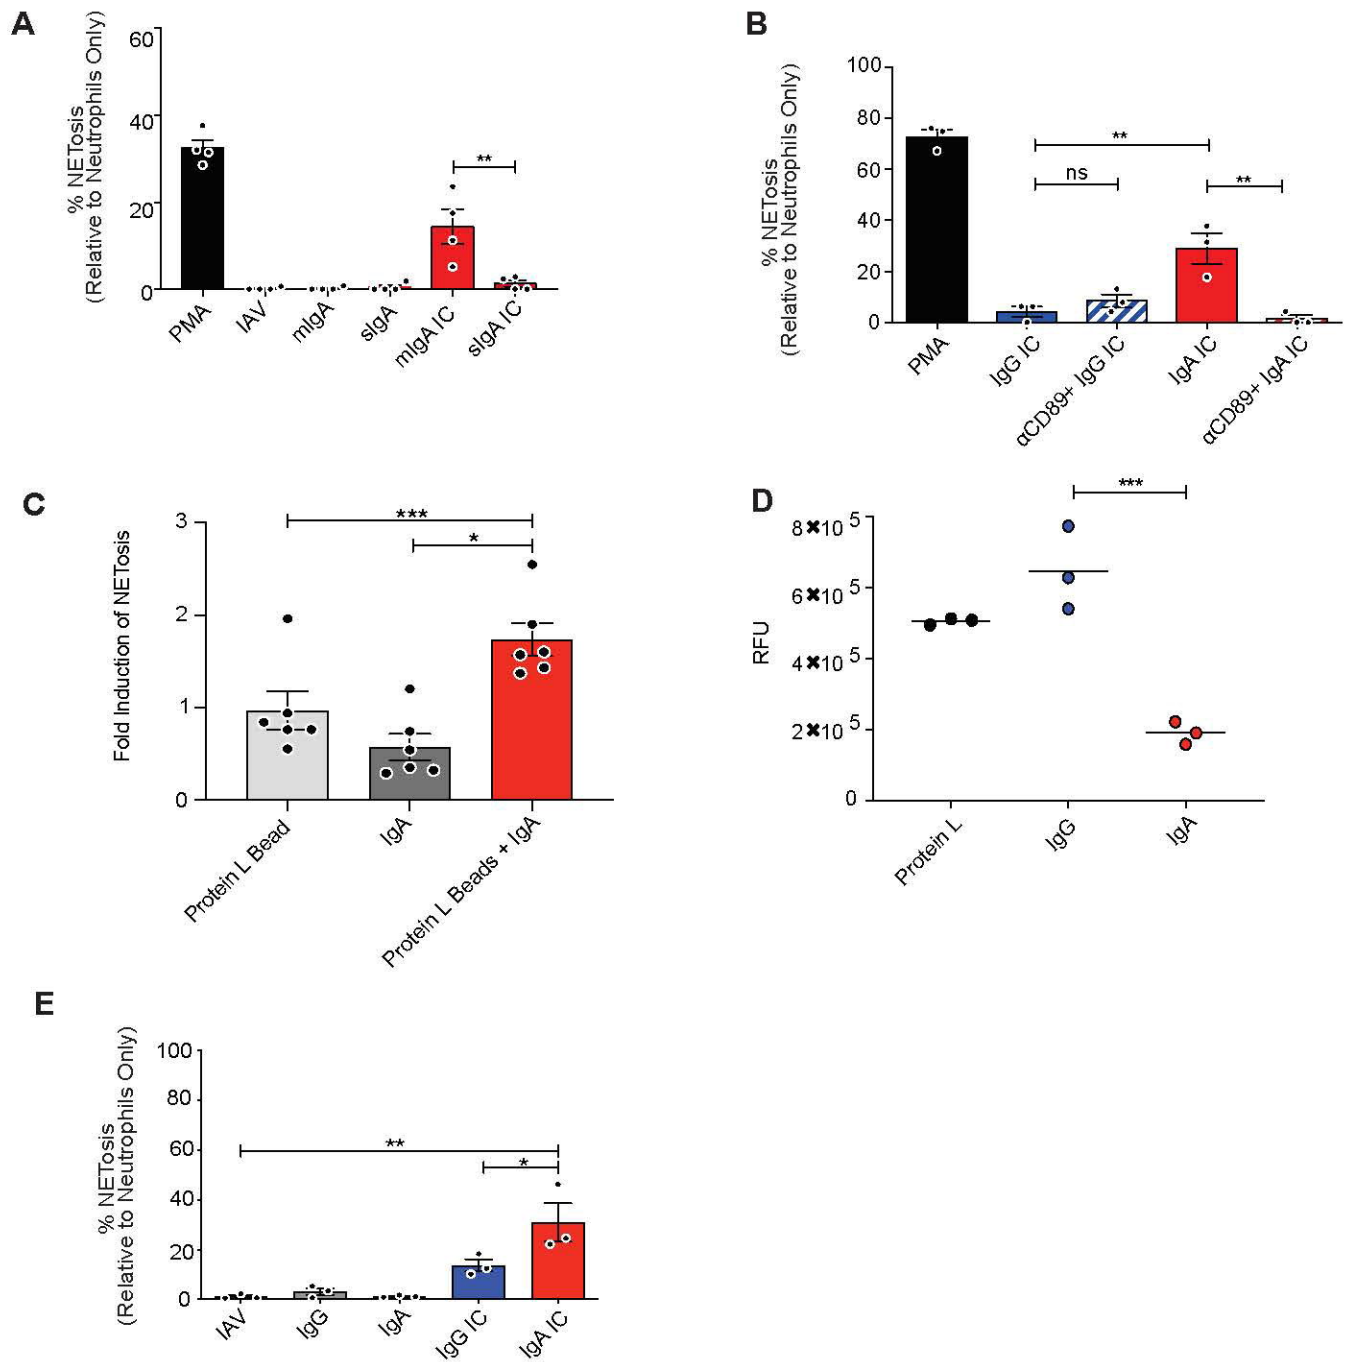

Figure 3

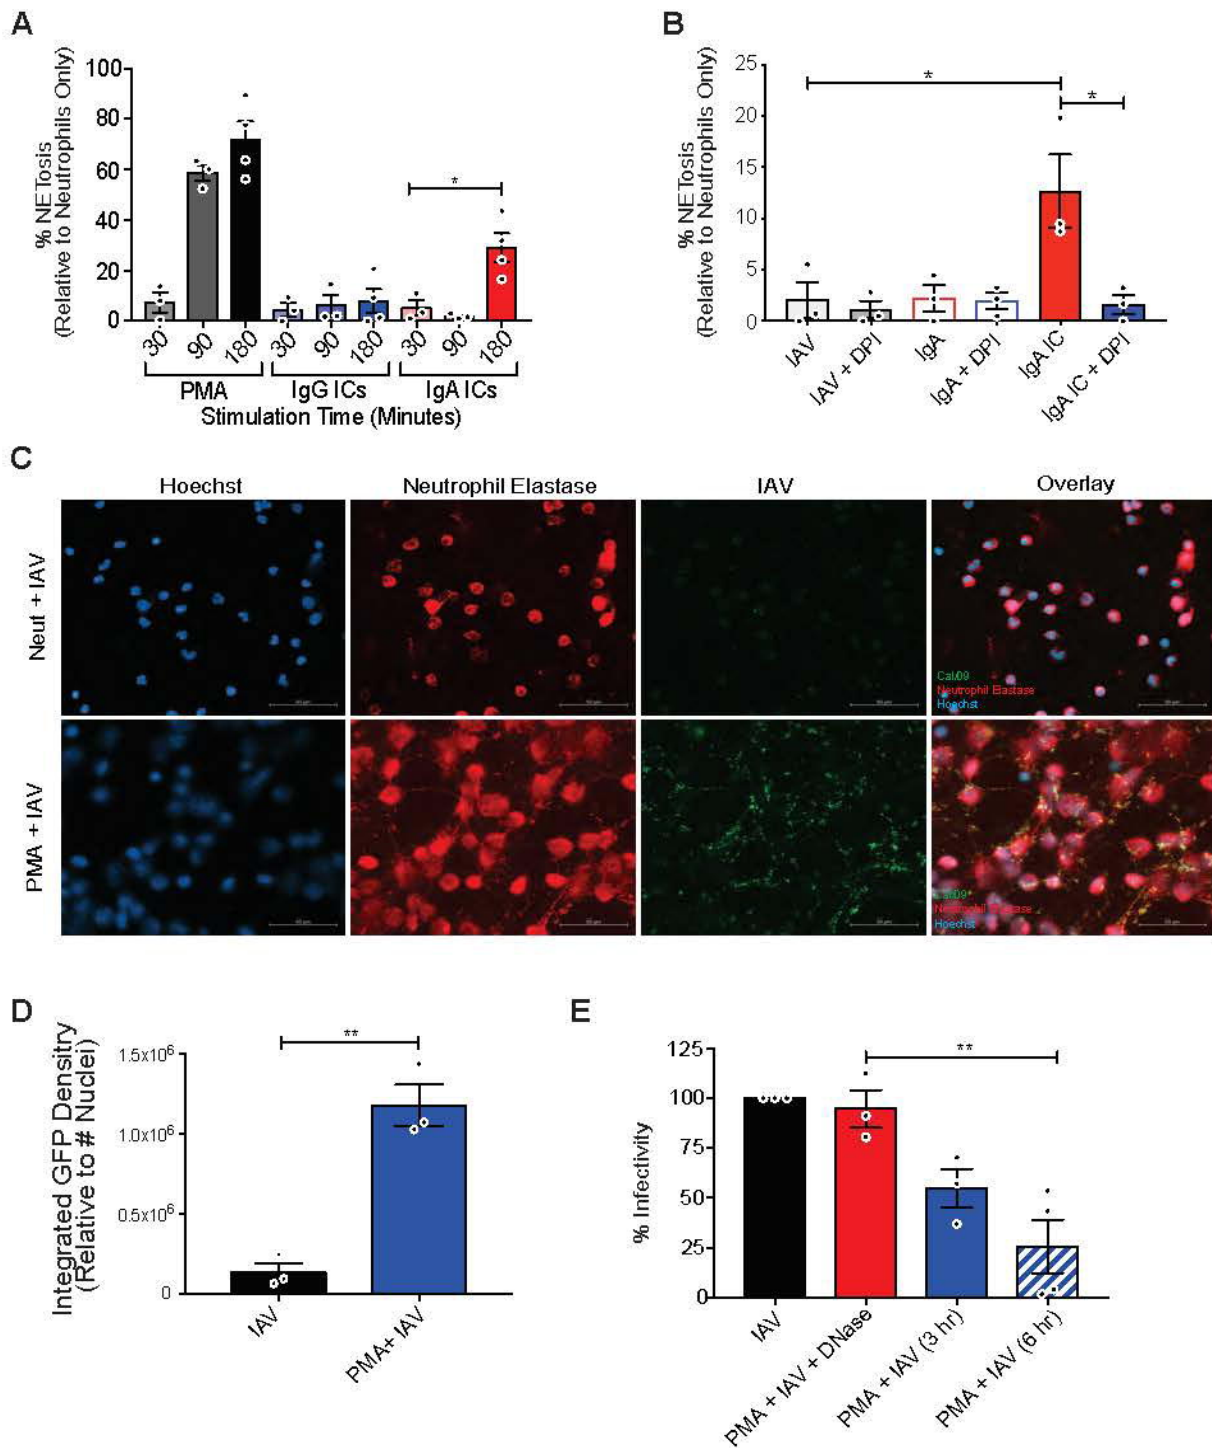

Figure 4
